# Supplementary material
Source: MDPI journal article supplement (https://www.mdpi.com/2624-8549/2/2/23)
Supplement: s1 [file s1]

## Size and Surface Charge Dependent Impregnation of Nanoparticles in Soft- and Hardwood <sup>†</sup>

David Bossert <sup>1,‡</sup>, Christoph Geers <sup>1,\*‡</sup>, Maria Inés Placencia Peña <sup>2</sup>, Thomas Volkmer <sup>2</sup>, Barbara Rothen-Rutishauser <sup>1</sup> and Alke Petri-Fink <sup>1,3,\*</sup>

<sup>1</sup> Adolphe Merkle Institute, University of Fribourg, Chemin des Verdiers 4, 1700 Fribourg, Switzerland; david.bossert@unifr.ch (D.B.); barbara.rothen@unifr.ch (B.R.-R.)

<sup>2</sup> Bern University of Applied Sciences, Architecture, Wood and Civil Engineering, Solothurnstrasse 102, 2500 Biel, Switzerland; ines.placencia@gmail.com (M.I.P.P.); thomas.volkmer@bfh.ch (T.V.)

<sup>3</sup> Chemistry Department, University of Fribourg, Chemin du Musée 9, 1700 Fribourg, Switzerland

\* Correspondence: christoph.geers@unifr.ch (C.G.); alke.fink@unifr.ch (A.P.-F.)

<sup>†</sup> In Honor of Professor Bernd Giese on the Occasion of His 80th Birthday.

<sup>‡</sup> These authors contributed equally

**Figure S1:** FT-IR spectrum of PETES-SiO<sub>2</sub> 70 nm

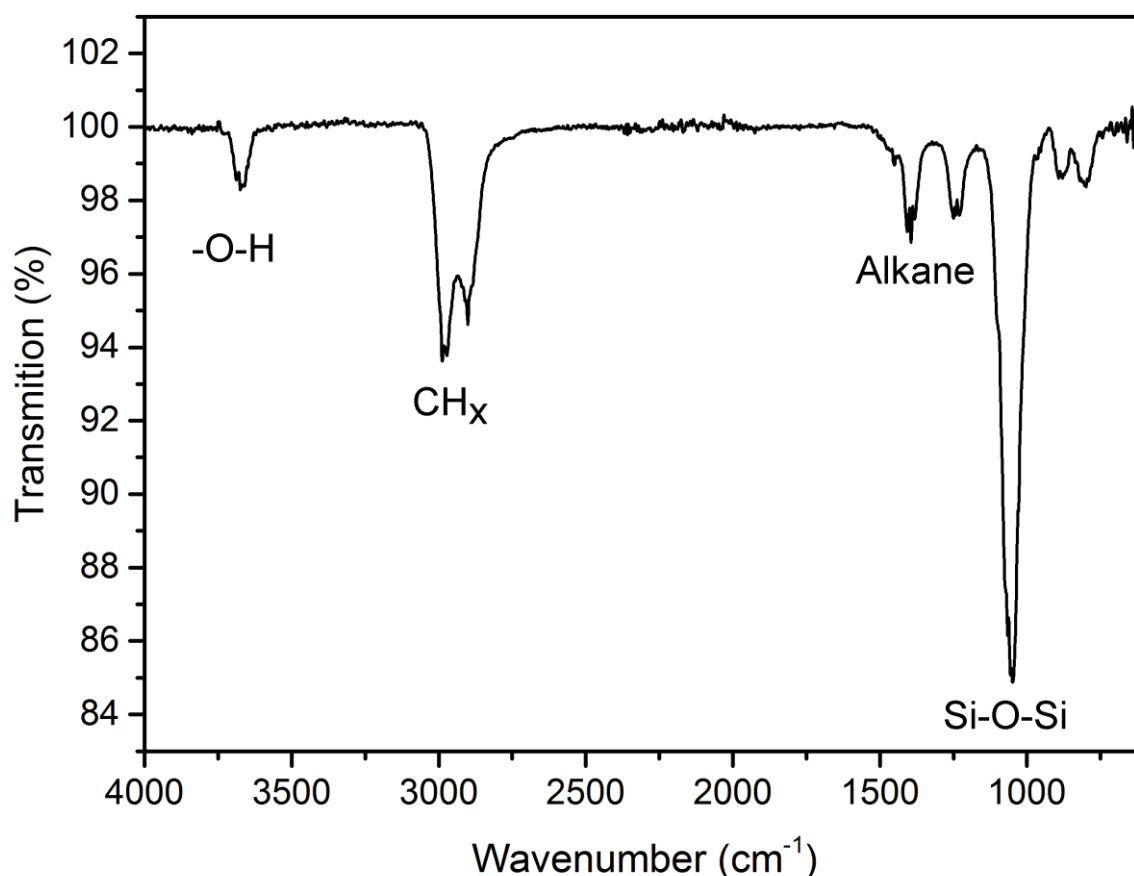

**Figure S1.** The signal at 3675 cm<sup>-1</sup> corresponds to stretching vibration of surface -O-H from remaining unbound silanol groups. The pentyl chain shows characteristic signals from symmetric and asymmetric C-H stretching vibrations at 3000 cm<sup>-1</sup>. Other C-H signals are attributed to bending vibrations at 1414 and 1230 cm<sup>-1</sup> and rocking

vibrations at  $892\text{ cm}^{-1}$ , respectively. The intensive signal at  $1047\text{ cm}^{-1}$  corresponds to the Si-O-Si stretching vibration.

**Figure S2: Impregnation of APTES-SiO<sub>2</sub> 70 nm in EtOH**

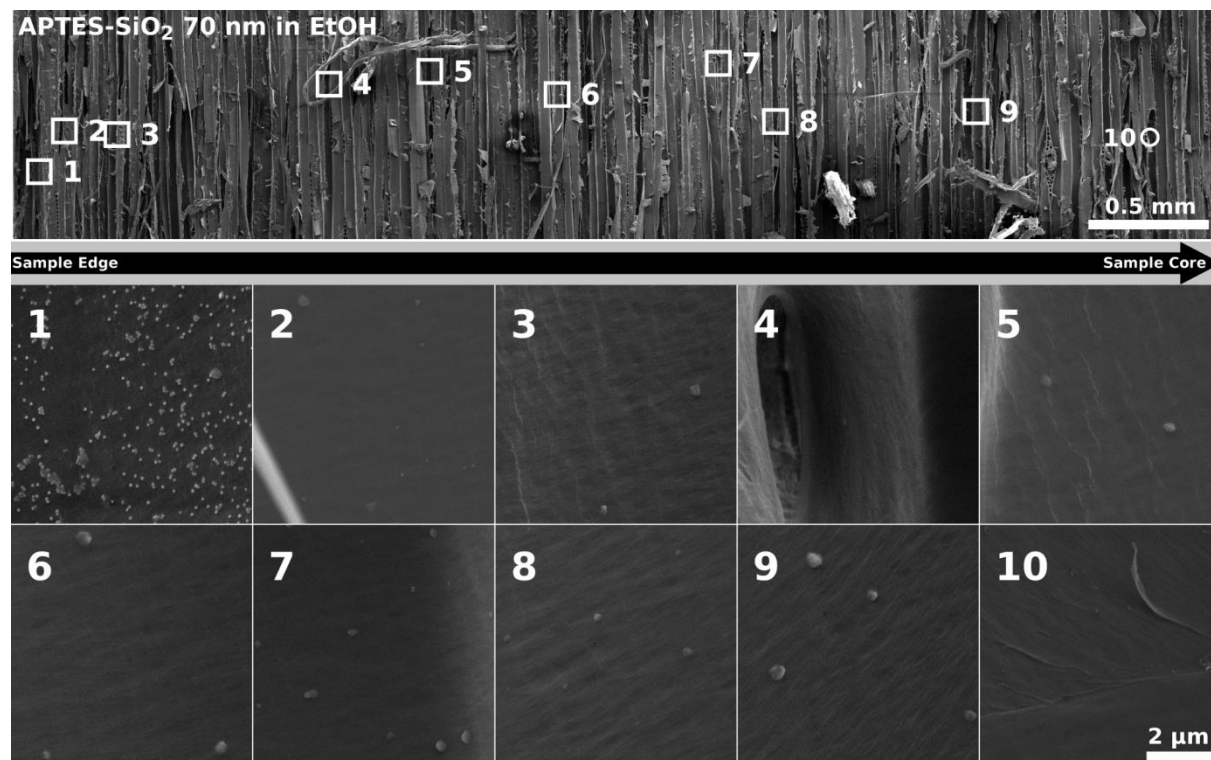

**Figure S2.** APTES-SiO<sub>2</sub> 70 nm show better impregnation in ethanol than in water. The particles are found in the tracheid closest to the sample edge but not near the core. This could be explained with the improved colloidal stability of APTES-SiO<sub>2</sub> in EtOH compared to water (**Error! Reference source not found.**). The amino propyl functionalization interacts strongly with the wood surface, which has been reported before.<sup>[25]</sup>

**Figure S3: Impregnation of PETES-SiO<sub>2</sub> 70 nm in EtOH**

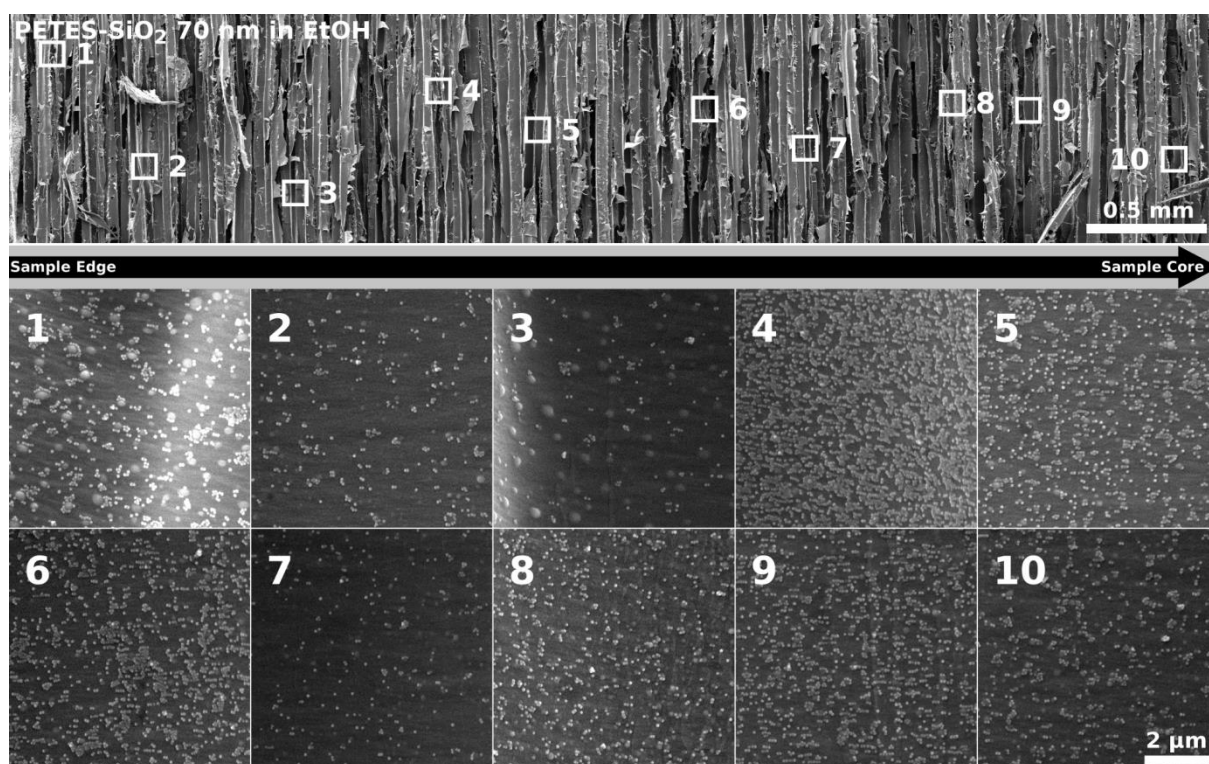

**Figure S3.** PETES-SiO<sub>2</sub> 70 nm dispersed in EtOH are also detected near the core of pine samples. Fewer particles were found, but again located on the cell wall of tracheids. In general, impregnations in water were better than in ethanol.
